# Supplementary material
Source: Royal Society of Chemistry journal article supplement (doi:10.1039/d6dt00590j)
Supplement: d6dt00590j1.pdf [file d6dt00590j1.pdf]

## Support Information

### Photothermal Catalysis Driven by Defect-Engineered Mn-doped V<sub>2</sub>O<sub>5</sub> for Efficient Rhodamine B Degradation

Xiaoxia Zhou<sup>##a</sup>, Jixing Fan<sup>#a</sup>, Zhiming Zhou<sup>a</sup>, Xiaoxiao Yu<sup>a</sup>, Zhili Song<sup>a,b</sup>, Zihua Wu<sup>\*a</sup>, Huaqing Xie<sup>a</sup>

<sup>a</sup>School of Energy and Materials, Shanghai Polytechnic University, Shanghai, 201209, China

<sup>b</sup> Shanghai Hongli Purification Technology Co., Ltd,7, China.

# These authors contributed equally to this work.

Corresponding author: Zihua Wu

E-mail: [xxzhou@sspu.edu.cn](mailto:xxzhou@sspu.edu.cn)

[wuzihua@sspu.edu.cn](mailto:wuzihua@sspu.edu.cn);

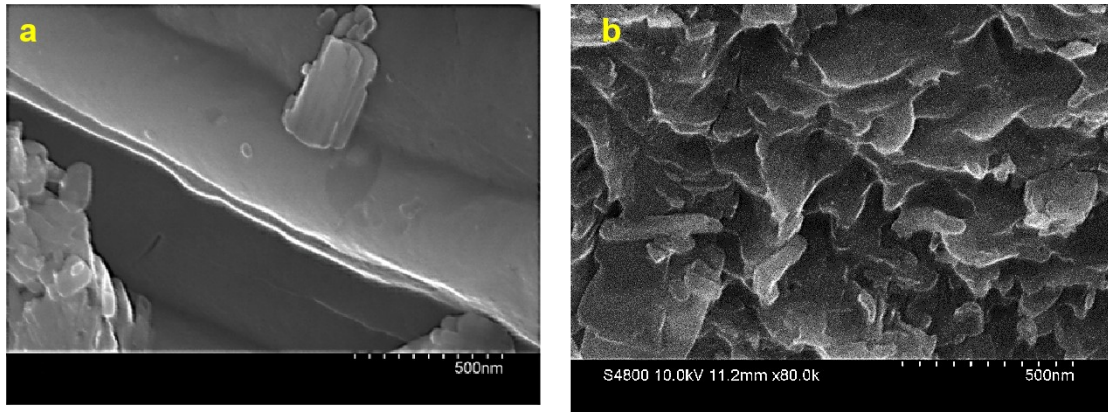

**Figure S1.** SEM images of the samples (a)  $V_2O_5$  and (b)  $Mn_{0.07}-V_2O_5$ .

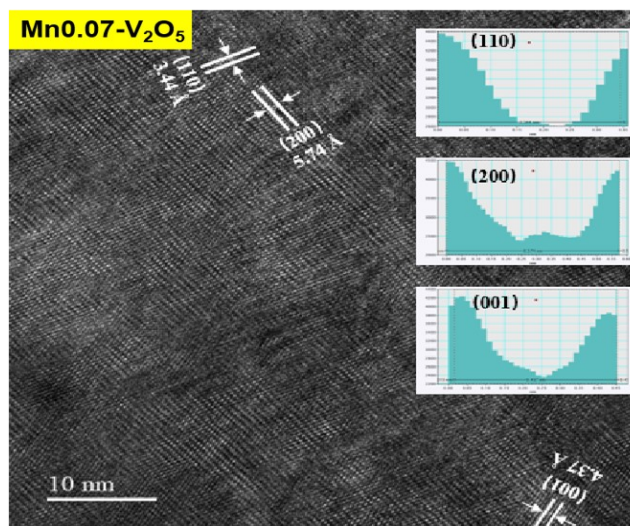

**Figure S2.** HRTEM image of the samples)  $\text{Mn}_{0.07}\text{-V}_2\text{O}_5$ .
